# Supplementary material
Source: PubMed Central journal article supplement (PMC3917988)
Supplement: rna-10-1853-s01.pdf [file rna-10-1853-s01.pdf]

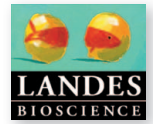

## **Supplemental Material to:**

**Marc Parisien, Xiaoyun Wang, and Tao Pan**

**Diversity of human tRNA genes from  
the 1000-genomes project**

**2013; 10(12)**

**<http://dx.doi.org/10.4161/rna.27361>**

**[www.landesbioscience.com/journals/rnabiology/article/27361/](http://www.landesbioscience.com/journals/rnabiology/article/27361/)**



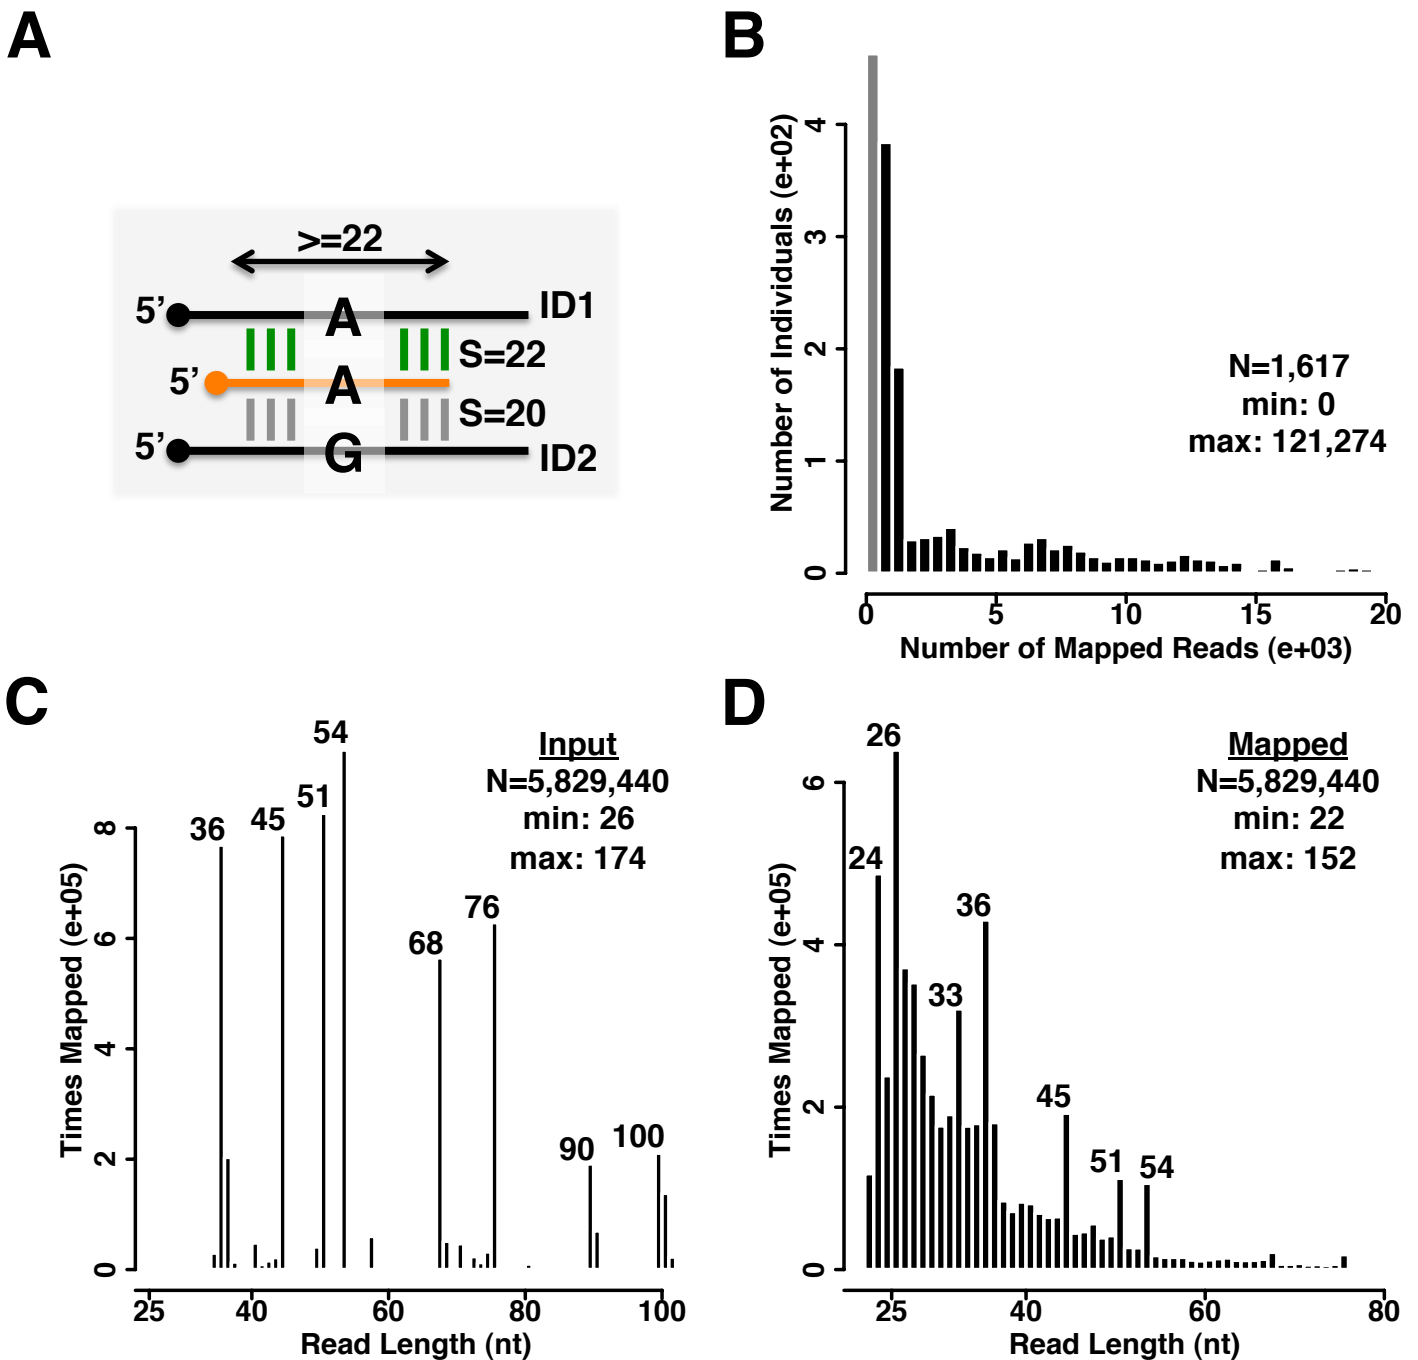

**Figure S2.** Deep-sequencing reads mapping on the tRNA database. **(A)** Mapping strategy. A deep-sequencing read (orange) can be aligned (vertical bars) to two tRNA isodecoders (ID1 and ID2) that differ at one nucleotide position (A/G) on a (minimum) length of 22 nucleotides. The score  $S$  of an alignment is computed as the number of matches minus the number of mismatches. The read is assigned to ID1 (green) as opposed to ID2 (grey) since the alignment has a better score with ID1 ( $22-0=22$ ) versus ID2 ( $21-1=20$ ). This way, a read aligned with a mismatch hasn't found any better tRNA isoacceptor or isodecoder sequence match. The reference tRNA sequences feature their introns. **(B)** Distribution of the number of mapped deep-sequencing reads per individual. About 70% of individuals have more than 500 reads mapped (black vertical bars). **(C)** Distribution of the mapped deep-sequencing reads length as found in the data files. Selected peaks are identified. **(D)** Distribution of the mapped deep-sequencing reads length. Selected peaks are identified. Pearson's  $R^2=0.008$  for the correlation between mapped read length and the length of the input read.

**Homo sapiens CTS telomere maintenance complex component 1 (CTC1), transcript variant 2, non-coding RNA**

```
NR_046431 CCCTATATTAAGATTTGAAGTAGACCCGAAAGTTAGTGGCCGGTTAGCTCAGTTGGTTA 4680
ILE-AAT -----GGCCGGTTAGCTCAGTTGGTTA 22
*****

NR_046431 GAGCGTGGTGCTAATAACGCCAAGGTCGCGGGTTCGAACCCCGTACGGGCCAGTGGGTGG 4740
ILE-AAT GAGCGTGGTGCTAATAACGCCAAGGTCGCGGGTTCGATCCCCGTACGGGCCA----- 74
*****
```

**Homo sapiens long intergenic non-protein coding RNA 324 (LINC00324), non-coding RNA**

```
NR_026951 TCGGCTCGTTGGTCTAGGGGTATGATTCTCGCTTCGGGTGCGAGAGGTCCCGGGTTCAAAA 660
ProAGG -----AGAGGTCCCGGGTTCAAAA 81
*****

NR_026951 TCCCGGACGAGCCCTCCTTTACCTTTTACTGAGACAAGAGTGCTTCAAGGAATAGGTTA 720
ProAGG TCCCGGACGAGCCC----- 95
*****
```

**Homo sapiens microRNA 3676 (MIR3676), microRNA**

```
NR_037447 -----TTGGTTAAAGCGCCTGTCTAGTAAACAGGAGATCCTGGGTTCGAA 45
ThrAGT AGCACCATGGCTTAGCTGGTTAAAGCACCTGTCTAGTAAACAGGAGATCCTGAGTTTCAA 60
*****.*****.*** **

NR_037447 TCCCAGCGGTGCCTCCGTGTTTCCCCCACGCTTTTGCCAA 85
ThrAGT TTCCAATGGTGCCT----- 74
* **.* *****
```

**Figure S3.** *Transfer RNAs with significant sequence identity to Human RNA transcripts.*

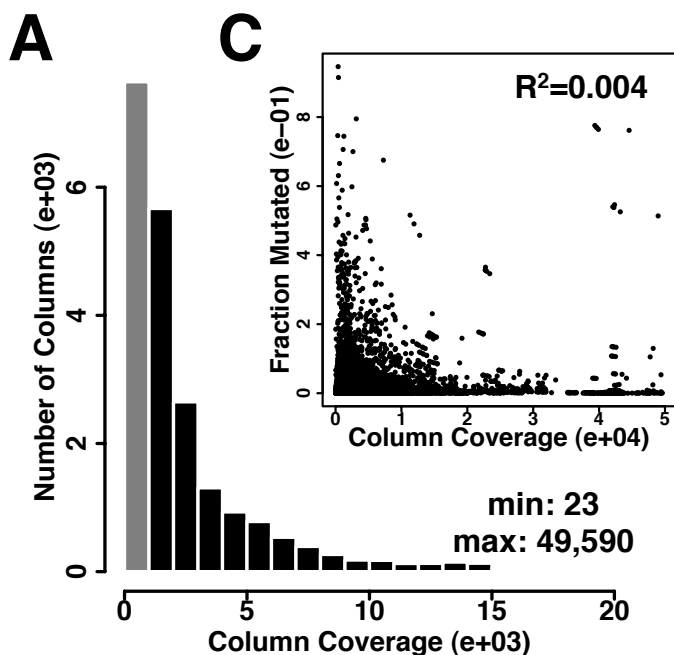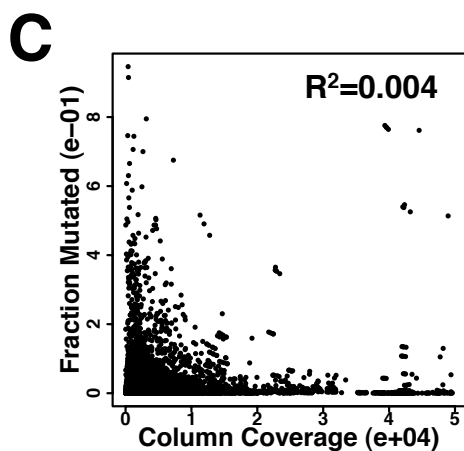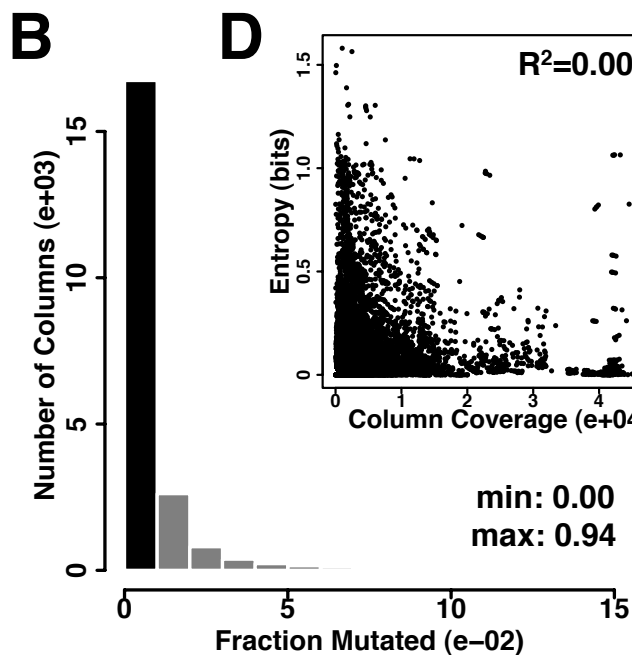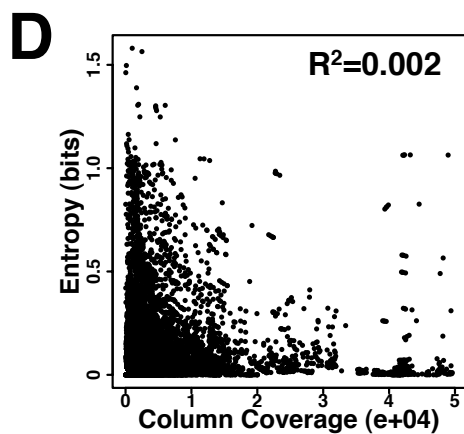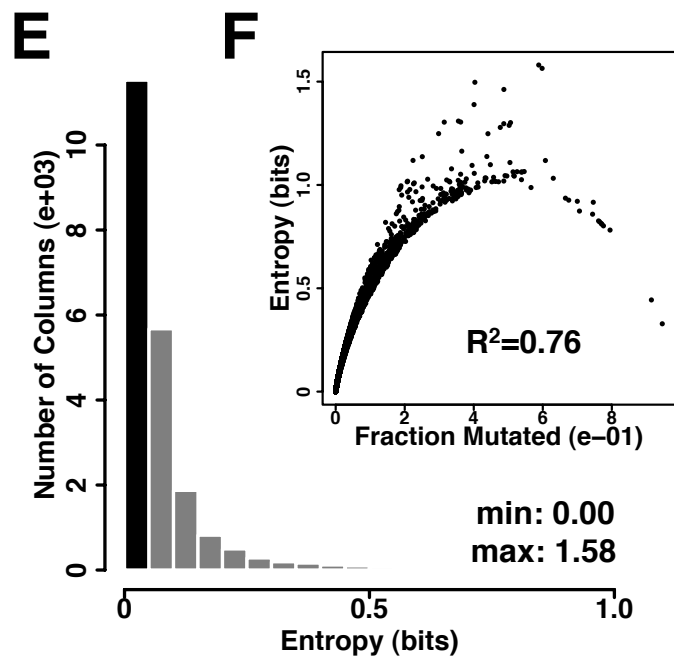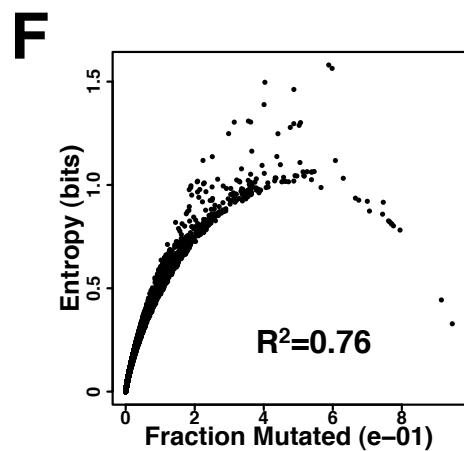

**Figure S4. Column coverage on the tRNA database.** A total of 21,785 columns are inspected for deep-sequencing coverage. **(A)** Distribution of column coverages. About 65% of columns have coverage of at least 1,000 (vertical black bars). **(B)** Distribution of mutation rates per columns. The rate is computed from the fraction of nucleotides in the column that do not correspond to the reference sequence. As much as 55% of columns have mutation rates below 0.5% (vertical black bar). **(C)** Scatter plot of column mutation rate with respect to the column's coverage. Pearson's  $R^2$  indicates no correlation. **(D)** Scatter plot of column entropy rate with respect to the column's coverage. Pearson's  $R^2$  indicates no correlation. **(E)** Distribution of sequence entropy per column. The sequence entropy of a column gives an indication on how many different symbols appear in a column and in what quantities. A column with equal shares of A, C, G and T's would have a perfect entropy of 2. About 53% of columns have entropy values less than 0.05 (vertical black bar). **(F)** Scatter plot of entropy rate of a column with respect to its mutation rate. Pearson's  $R^2$  indicates a strong correlation. Indeed, a high entropy column requires a high mutation rate. The inverse is not necessarily true: a high mutation rate column could feature only one alternative symbol, therefore keeping the entropy low (arch-like plot). **(G)** Scatter plots of mutation rates versus column coverage: for the first 30 nucleotides of tRNAs with scores greater than 50 (left) and for the last 40 nucleotides of tRNAs with scores lower than 50 (right).

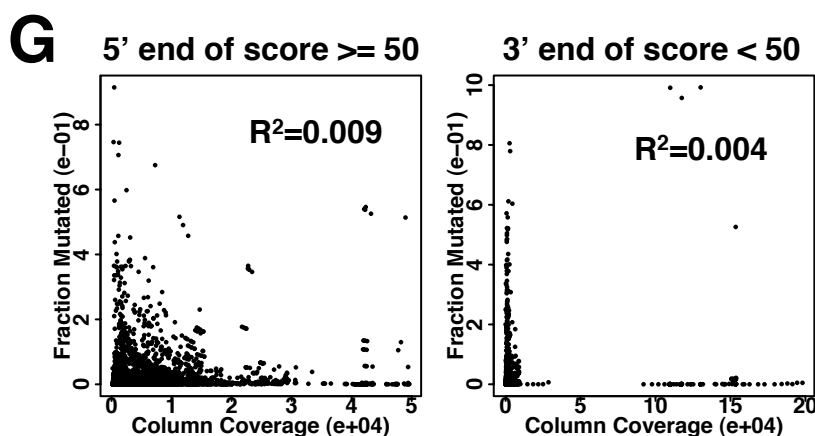

**Figure S4**

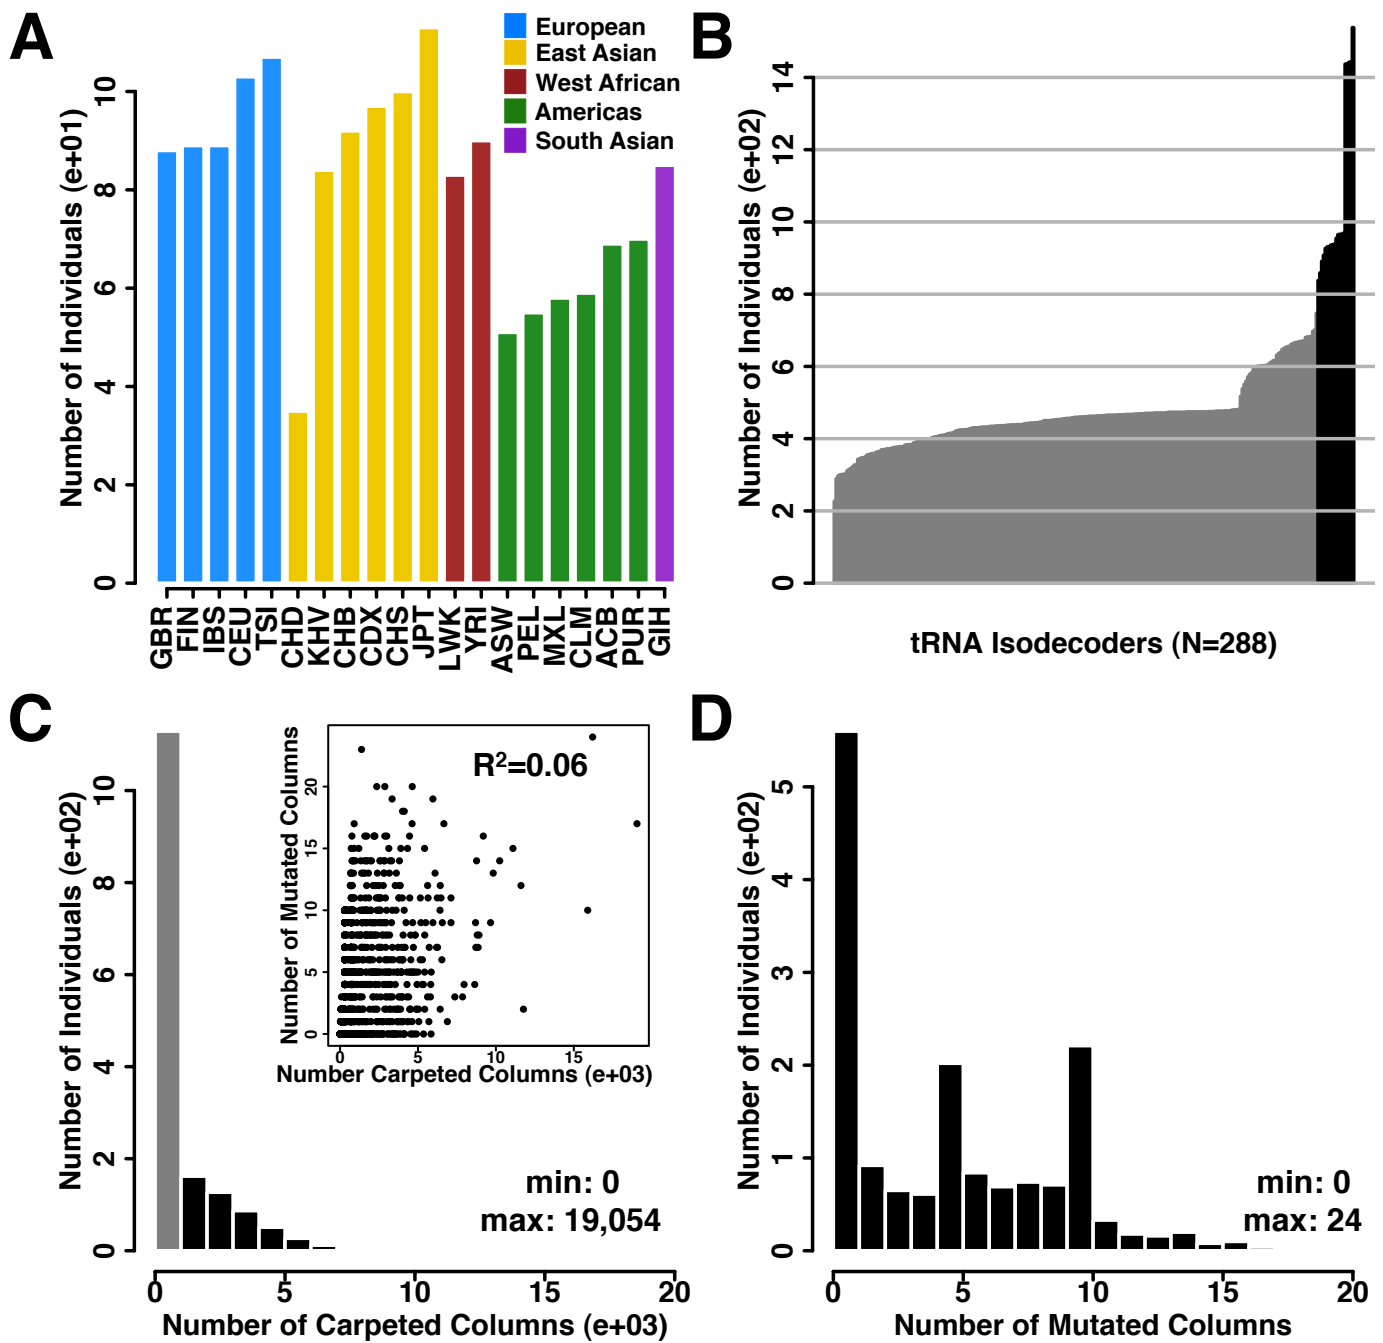

**Figure S5.** Coverage per individual, for  $N=1,617$  individuals. **(A)** Number of individuals per population code. **(B)** Number of individuals per tRNA isodecoders. An individual is counted for an isodecoder only if it has some deep-sequencing data that maps on that isodecoder. There are 288 isodecoders with tRNA-Scan scores  $\geq 50$ . Only 20 isodecoders are present in at least half of the individuals (vertical black bars). **(C)** Distribution of carpeted columns, those with good coverage ( $\geq 10$ ). Only 30% of individuals have more than 1,000 columns with good coverage among the total 21,785 (vertical black bars). Pearson's  $R^2=0.06$  indicates that there is no correlation between the number of carpeted columns and their mutated status (inset). **(D)** Distribution of mutated columns.







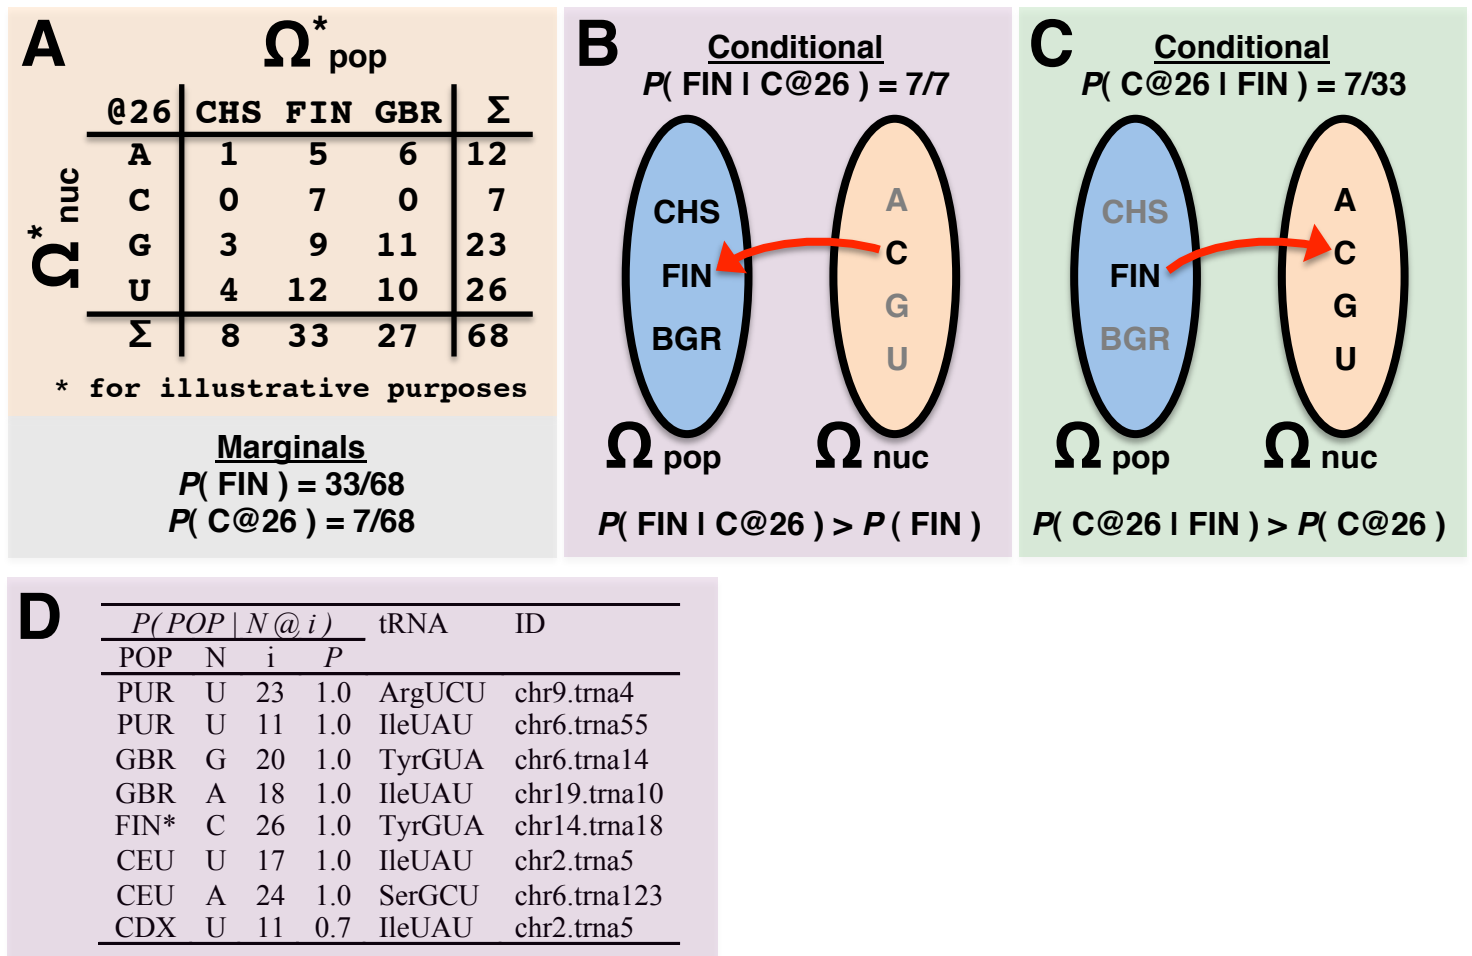

**Figure S7. Conditional probability analysis for tRNA alleles.** (A) Consider a simplified contingency table where we collect occurrences of all four nucleotides  $\Omega_{nuc}$  for three population codes  $\Omega_{pop}$  at the 26<sup>th</sup> column of a given tRNA isodecoder sequence alignment. From the table, we can compute marginal probabilities, like  $P(FIN)$ , the probability of an individual to be of the FIN population group, and  $P(C@26)$ , the probability to observe a C at column 26 (grey area). (B) Now we can ask if there's any gain for an element in a sample space  $\Omega$  given the knowledge of an element in the other sample space; a conditional probability. For instance, we can ask what's the probability of an individual to be of the FIN population code given that it has a C at column 26, which we write as  $P(FIN|C@26)$ . The space of ancestries  $\Omega_{pop}$  and the space of nucleotide identities  $\Omega_{nuc}$  are laid side-by-side: The red arrow suggests a two-step process: FIN ancestry is estimated given the knowledge of nucleotide identity at position 26. Here, the conditional probability  $P(FIN|C@26)$  is higher than the marginal  $P(FIN)$  (magenta area). (C) Likewise, we can ask if there's any gain in knowing the population code of an individual on the nucleotide distribution. Here too, the conditional probability  $P(C@26|FIN)$  is higher than the marginal  $P(C@26)$  (green area). (D) Probability table conditioned on nucleotide identity. The table shows the probability  $P$  of ancestry POP given the knowledge of nucleotide identity  $N$  at position  $i$ . All entries have  $P(POP) \ll P(POP|N@i)$ , that is, the knowledge of nucleotide identity increases significantly the knowledge about ancestry. The entry with a star corresponds to the case depicted in panel B, with actual numbers from the 1,000 genomes project. The probability is rounded up to a value of 1.0 which makes it almost certain that a person would be of Finnish ancestry given we observe a C at position 26 of tRNA Tyr<sup>GUA</sup>. Probability tables conditioned on ancestry can be found in the main figures.

| POP code                            | Description                         |
|-------------------------------------|-------------------------------------|
| <b>European Ancestry (Euro)</b>     |                                     |
| CEU                                 | Northern and Western European       |
| TSI                                 | Toscani in Italia                   |
| GBR                                 | British from England and Scotland   |
| FIN                                 | Finnish from Finland                |
| IBS                                 | Iberian in Spain                    |
| <b>East Asian Ancestry (EaAs)</b>   |                                     |
| CHB                                 | Han Chinese in Beijing, China       |
| JPT                                 | Japanese in Tokyo, Japan            |
| CHS                                 | Han Chinese South                   |
| CDX                                 | Chinese Dai in Xishuangbanna        |
| KHV                                 | Kinh in Ho Chi Minh City, Vietnam   |
| CHD                                 | Chinese in Denver, Colorado         |
| <b>West African Ancestry (WeAf)</b> |                                     |
| YRI                                 | Yoruba in Ibadan, Nigeria           |
| LWK                                 | Luhya in Webuye, Kenya              |
| <b>Americas (Amer)</b>              |                                     |
| ASW                                 | African Ancestry in Southwest US    |
| ACB                                 | African Caribbean in Barbados       |
| MXL                                 | Mexican Ancestry in Los Angeles, CA |
| PUR                                 | Puerto Rican in Puerto Rico         |
| CLM                                 | Colombian in Medellin, Colombia     |
| PEL                                 | Peruvian in Lima, Peru              |
| <b>South Asian Ancestry (SoAs)</b>  |                                     |
| GIH                                 | Gujarati Indian in Houston, TX      |

**Table S1.** *Population codes found in this study and their ancestry.*
